# Supplementary material for: A water-soluble sensor for distinguishing D2O from H2O by dual-channel absorption/fluorescence ratiometry
Source: Royal Society of Chemistry journal article supplement (doi:10.1039/d2cc05033a), 2022-01-01
Supplement: d2cc05033a1.pdf [file d2cc05033a1.pdf]

## Electronic Supplementary Information

### **A water-soluble sensor for distinguishing D<sub>2</sub>O from H<sub>2</sub>O by dual-channel absorption/fluorescence ratiometry**

Fei Zheng,<sup>†</sup> Yanju Luo,<sup>\*,†,‡</sup> Chenghui Li,<sup>‡</sup> Yan Huang,<sup>†</sup> Zhiyun Lu,<sup>†</sup> Xiandeng Hou<sup>\*,†,‡</sup>

<sup>†</sup>*Key Laboratory of Green Chemistry and Technology (Ministry of Education), College of Chemistry, Chengdu, Sichuan 610064, China. Email: houxd@scu.edu.cn*

<sup>‡</sup>*Analytical & Testing Center, Sichuan University, Chengdu, Sichuan 610064, China. Email: luoyanju@scu.edu.cn*

## Table of Contents

|                                                                                                                                                                               |     |
|-------------------------------------------------------------------------------------------------------------------------------------------------------------------------------|-----|
| 1. Experimental Section .....                                                                                                                                                 | S4  |
| 1.1 Reagents and Methods .....                                                                                                                                                | S4  |
| 1.2 Synthesis and Characterization .....                                                                                                                                      | S4  |
| 1.2.1 Scheme S1. Synthetic route of <b>Cy</b> .....                                                                                                                           | S6  |
| 1.2.2 Scheme S2. Reaction mechanism for the formation of <b>Cy</b> .....                                                                                                      | S6  |
| 1.3 Calculation of the $pK_a$ value .....                                                                                                                                     | S6  |
| 1.4 Detection the relative content of $H_2O$ and $D_2O$ .....                                                                                                                 | S6  |
| 1.5 RGB colorimetric .....                                                                                                                                                    | S7  |
| 1.6 Method reliability .....                                                                                                                                                  | S7  |
| 2. Supplementary Tables and Figures .....                                                                                                                                     | S8  |
| Figure S1 $^1H$ NMR spectra of <b>Cy</b> in $DMSO-d_6$ .....                                                                                                                  | S8  |
| Figure S2 $^{13}C$ NMR spectra of <b>Cy</b> in $DMSO-d_6$ .....                                                                                                               | S8  |
| Figure S3 HRMS spectra of <b>Cy</b> .....                                                                                                                                     | S9  |
| Figure S4 FTIR spectra of <b>Cy</b> .....                                                                                                                                     | S9  |
| Table S1 The chemical and physical properties of $H_2O$ and $D_2O$ .....                                                                                                      | S10 |
| Figure S5 Optimization diagram of the sensor concentration .....                                                                                                              | S11 |
| Figure S6 <b>Cy</b> detect $D_2O$ content in $H_2O$ via dual-channels .....                                                                                                   | S12 |
| Figure S7 Fluorescence decay curves and FTIR spectra .....                                                                                                                    | S13 |
| Table S2 The fitted photoluminescence lifetime data of <b>Cy</b> .....                                                                                                        | S13 |
| Figure S8 The stability of <b>Cy</b> .....                                                                                                                                    | S14 |
| Figure S9 The selectivity of <b>Cy</b> .....                                                                                                                                  | S15 |
| Figure S10 The selectivity of <b>Cy</b> .....                                                                                                                                 | S16 |
| Figure S11 The anti-interference of <b>Cy</b> .....                                                                                                                           | S16 |
| Scheme S3 The basic construction of 3D-printed setup .....                                                                                                                    | S17 |
| Figure S12 Calibration curve of the RGB .....                                                                                                                                 | S17 |
| Figure S13 The accuracy of <b>Cy</b> .....                                                                                                                                    | S18 |
| Table S3 Analytical results for the determination of $H_2O$ content in total volume (%) .....                                                                                 | S18 |
| .....                                                                                                                                                                         | S18 |
| Table S4 Comparison of currently reported organic small-molecule optical sensors based on the acid-base response mechanism for distinguishing between $H_2O$ and $D_2O$ ..... | S19 |
| .....                                                                                                                                                                         | S19 |
| Table S5 Comparison of currently reported optical sensors for distinguishing between $H_2O$ and $D_2O$ .....                                                                  | S21 |

|                                                                                                                            |     |
|----------------------------------------------------------------------------------------------------------------------------|-----|
| Table S6 Comprehensively analyze the advantages and disadvantages of representative D <sub>2</sub> O optical sensors. .... | S22 |
| 3. Reference .....                                                                                                         | S23 |

## 1. Experimental Section

### 1.1 Reagents and Methods

Unless otherwise described, all reagents and anhydrous solvents used in this work were purchased from commercial sources and used without further purification. D<sub>2</sub>O was purchased from Sigma-Aldrich, and dimethyl sulfoxide (DMSO, 99.7%, Superdry, with molecular sieves, J&K Seal), acetonitrile (MeCN, 99.9%, Superdry, with molecular sieves, J&K Seal) and *N,N*-dimethylformamide (DMF, 99.8%, Superdry, with molecular sieves, J&K Seal) were purchased from J&K Scientific Co. Ltd. (Beijing, China). 2-((*E*)-2-((*E*)-2-Chloro-3-(2-((*E*)-3,3-dimethyl-1-propylindolin-2-ylidene)ethylidene)cyclohex-1-en-1-yl)vinyl)-3,3-dimethyl-1-propyl-3H-indol-1-ium iodide (IR-780) was purchased from JiangSu Aikon Biomedical R&D Co., Ltd. (Nanjing, China). Resorcinol were purchased from Bide Pharmaceutical Technology Co., Ltd. (Shanghai, China). Deionized water was used to prepare the buffer solutions and as the analyte. For column chromatography, 300–400 mesh silica gel was used to purify the crude product.

<sup>1</sup>H NMR and <sup>13</sup>C NMR spectra were recorded on a Bruker AVANCE II-400 MHz spectrometer at 400 and 100 MHz in DMSO-*d*<sub>6</sub>, respectively. Tetramethylsilane (TMS) was used as an internal standard. All chemical shift data are reported in the standard  $\delta$  notation of parts per million (ppm). Splitting patterns were designed as follows: s (singlet), d (doublet), t (triplet) and m (multiplet). High-resolution mass spectra (HRMS) were measured on a Q-TOF Premier ESI mass spectrometer. Fourier transform-infrared spectra (FTIR) were measured on a Bruker INVENIO R, and pH values of the samples were measured using a PHS-3E pH meter. UV-visible spectra were measured on a Shimadzu UV-3600 spectrophotometer. Photoluminescence spectra were recorded on a Horiba Jobin Yvon Fluoromax-4 fluorescence spectrophotometer. Transient photoluminescence decay characteristics of the solution samples were recorded on a Single Photon Counting Controller FluoroHub-B (Horiba Jobin Yvon). Photographs were taken using a Huawei Mate20 smartphone.

### 1.2 Synthesis and Characterization.

Synthesis of (*E*)-2-(2-(6-hydroxy-2,3-dihydro-1H-xanthen-4-yl)vinyl)-3,3-dimethyl-1-propyl-3H-indol-1-ium iodide (**Cy**). Scheme S1 shows the synthetic route for the sensor **Cy**. Under a nitrogen atmosphere, resorcinol (110 mg, 1 mmol) and K<sub>2</sub>CO<sub>3</sub> (138 mg, 1 mmol) were added to a two-necked flask containing 5 mL anhydrous acetonitrile, and then the mixtures were stirred at room temperature for 20 min. After that, the acetonitrile solutions of IR-780 (267 mg, 0.2 mmol) were added to the reaction system, and the whole reaction was heated at 50 °C for 4 h. Then the solvent was removed by rotary evaporation, and the residual solid was chromatographed with a silica gel column using dichloromethane/methanol (50/1, v/v) as an eluent to finally obtain a blue-green powder (yield: 67%).

The reaction mechanism for the synthesis of **Cy** is unique. As shown in Scheme S2, IR-780 and resorcinol under the basic conditions will undergo the straightforward nucleophilic substitution of chlorine atom, retro-Knoevenagel reaction, cyclization reaction and dehydration reaction in sequence,<sup>1</sup> then finally obtain the target compound **Cy**. The molecular structure of the sensor **Cy** was characterized by <sup>1</sup>H NMR, <sup>13</sup>C NMR spectra, HRMS analyses and FTIR spectra (Figure S1-Figure S4). Due to the efficient hydrogen-deuterium exchange of the phenolic hydroxyl group of **Cy** in the deuterated reagent, the relevant hydrogen signal is indiscernible in the <sup>1</sup>H NMR spectrum. Hence, the FTIR spectrum was used for supplementary characterization, and the peak around 3100 cm<sup>-1</sup> indicates the existence of -OH. <sup>1</sup>H NMR (400 MHz, DMSO-*d*<sub>6</sub>) δ (ppm): 8.54 (d, *J* = 14.8 Hz, 1H), 7.75 (d, *J* = 6.0 Hz, 1H), 7.65 (d, *J* = 8.0 Hz, 1H), 7.55 (s, 1H), 7.52 (d, *J* = 8.8 Hz, 1H), 7.48 (d, *J* = 8.4 Hz, 1H), 7.41 (t, *J* = 7.2 Hz, 1H), 6.90 (s, 1H), 6.86 (dd, *J* = 8.4, 2.0 Hz, 1H), 6.49 (d, *J* = 14.8 Hz, 1H), 4.34 (t, *J* = 6.8 Hz, 2H), 2.72 (t, *J* = 5.6 Hz, 2H), 2.67 (t, *J* = 6.0 Hz, 2H), 1.85-1.80 (m, 4H), 1.75 (s, 6H), 0.99 (t, *J* = 7.2 Hz, 3H). <sup>13</sup>C NMR (100 MHz, DMSO-*d*<sub>6</sub>) δ (ppm): 176.7, 163.3, 161.4, 154.9, 144.3, 142.2, 135.2, 129.8, 129.3, 126.9, 125.8, 123.2, 115.8, 114.9, 114.4, 113.3, 103.6, 102.5, 50.5, 46.3, 28.7, 28.1, 24.1, 21.2, 20.5, 11.5. HRMS (ESI) *m/z* for C<sub>28</sub>H<sub>30</sub>INO<sub>2</sub> (M-I)<sup>+</sup> Calcd.: 412.2271, Found: 412.2275.

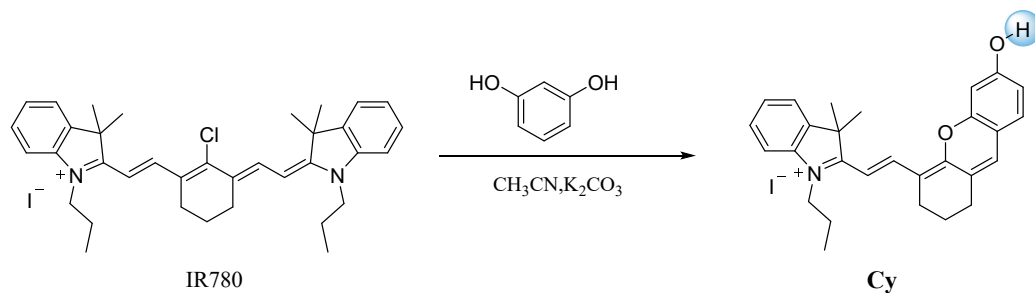

**Scheme S1.** Synthetic route of **Cy**.

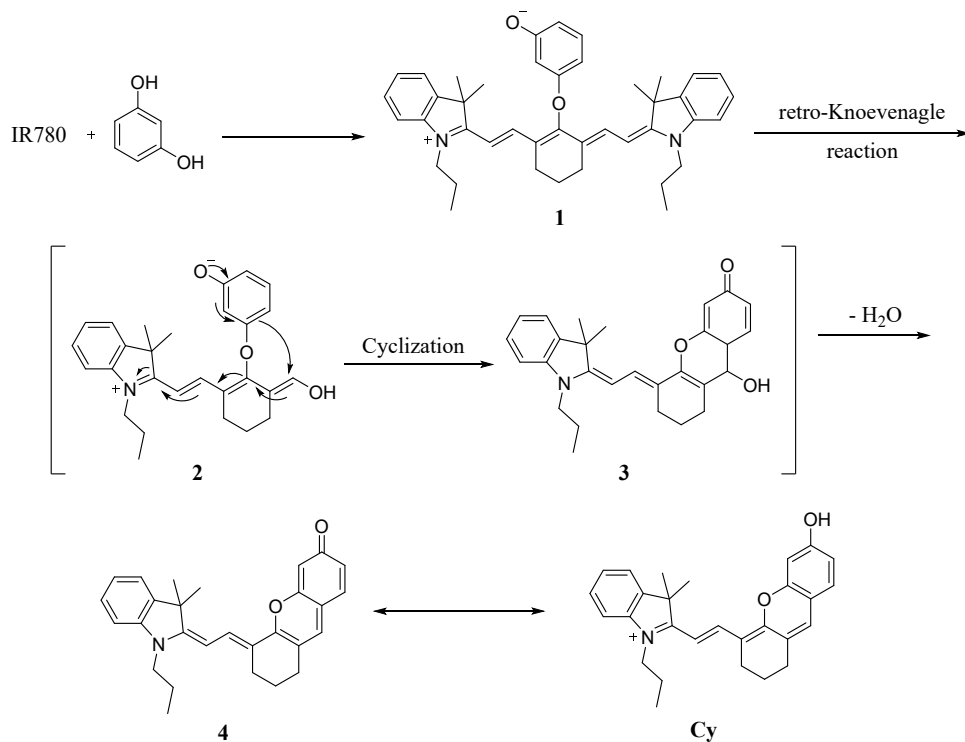

**Scheme S2.** Reaction mechanism for the formation of **Cy**<sup>1</sup>.

### 1.3 Calculation of the $pK_a$ value

Prepare buffer solutions of the sensor **Cy** with various pH values from 4.01 to 10.02 and characterize the corresponding fluorescence spectra. The  $pK_a$  value of **Cy** was calculated by regression analysis of the fluorescence intensity as a function of pH, where the analysis should fit to the Henderson-Hasselbalch-type mass action equation:

$$\log \left[ \frac{(F_{\max} - F)}{(F - F_{\min})} \right] = pK_a - \text{pH}$$

Where  $F$  is the fluorescence emission intensity at 725 nm,  $F_{\max}$  and  $F_{\min}$  are the corresponding maximum and minimum limiting values of  $F$ , respectively.

### 1.4 Detection the relative content of $\text{H}_2\text{O}$ and $\text{D}_2\text{O}$

Typically, the stock solution of **Cy** was prepared by dissolving **Cy** in ultra-dry DMF

(2 mM). Then, 22.5  $\mu\text{L}$  Cy was added to  $\text{D}_2\text{O}$  (or  $\text{H}_2\text{O}$  or  $\text{D}_2\text{O}$ - $\text{H}_2\text{O}$  mixtures) and the final concentration of the sensor was 100  $\mu\text{M}$ . UV-vis absorption and fluorescence emission spectra were conducted on the as-prepared solution samples. During the measurements, the lids of the cuvettes are always closed to prevent  $\text{D}_2\text{O}$  from absorbing moisture so as to affect the analytical results. All the experiments were repeated in triplicate to obtain consistent values.

In all subsequent experiments, the concentration of the sensor solution was fixed at 100  $\mu\text{M}$  and the detection system contained 5 vol% DMF.

### **1.5 RGB colorimetric**

The stock solutions of the sensor Cy were added to different systems separately, which contained distinct  $\text{H}_2\text{O}$ - $\text{D}_2\text{O}$  relative content. The detection process is shown in Scheme 2. Pictures of samples were taken with a smartphone and opened with the smartphone analysis application (APP). The detection region was selected in the APP (*Palette Cam*). Generally, the middle part of the reaction solution was selected for sampling. The numerical values of RGB were computed by the APP software and the calibration curve was obtained through data analysis.

### **1.6 Method reliability**

Randomly prepare five samples with various  $\text{H}_2\text{O}$ - $\text{D}_2\text{O}$  content (unknown relative proportion). The prepared samples were subjected to analysis with FTIR spectra (classical instrumental method) and the proposed Cy sensor, including absorption, fluorescence and RGB three channels. The FTIR spectra of all samples were performed on a Bruker INVENIO R Fourier transform-infrared spectrophotometer with the attenuated total reflection (ATR) mode.

## 2. Supplementary Tables and Figures

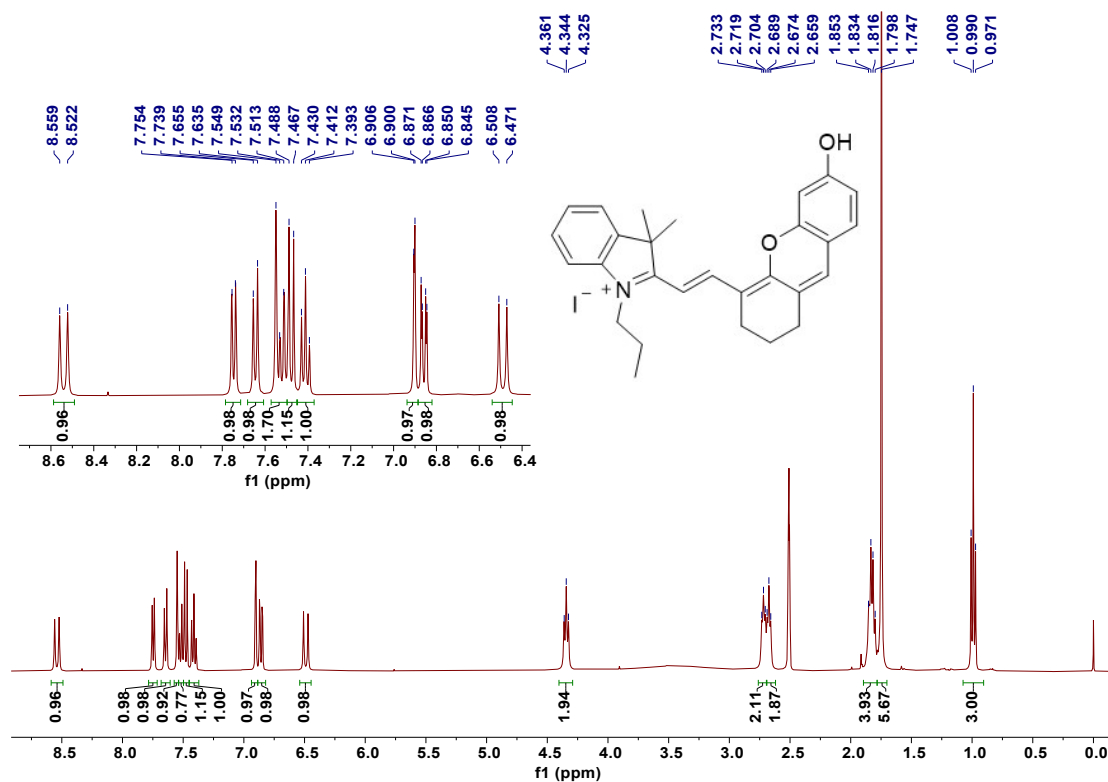

Fig. S1 <sup>1</sup>H NMR spectrum of Cy in DMSO-*d*<sub>6</sub>.

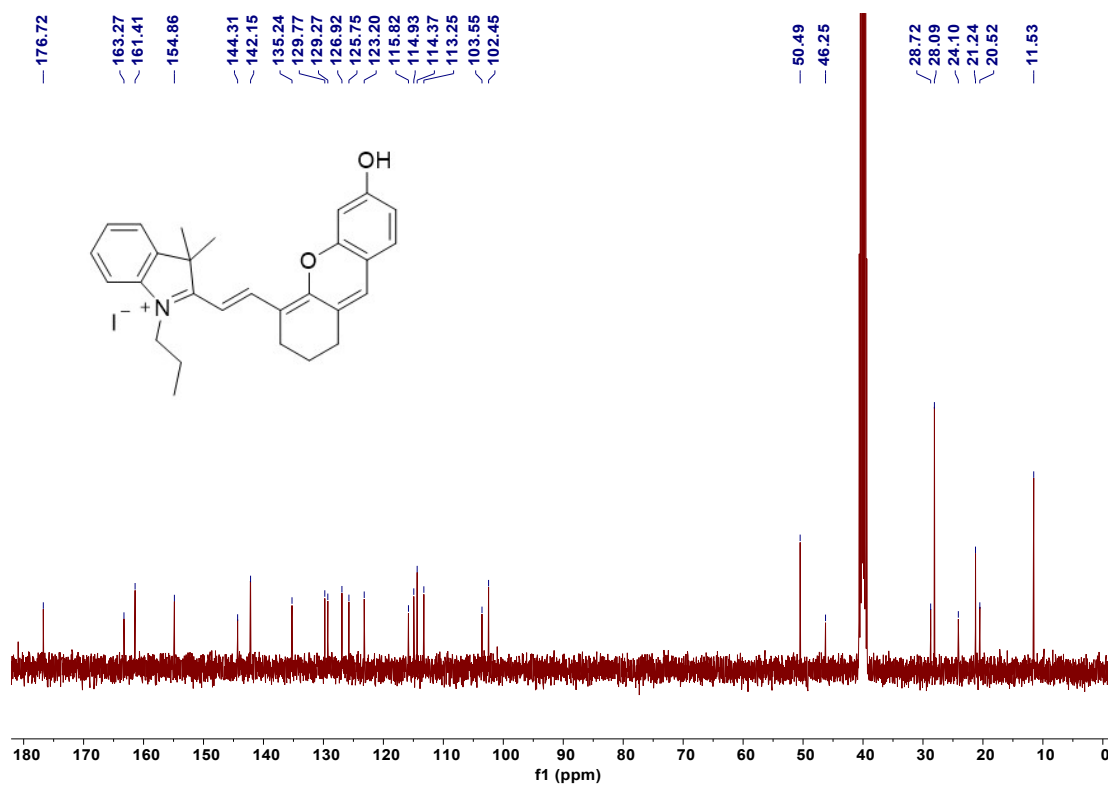

Fig. S2 <sup>13</sup>C NMR spectrum of Cy in DMSO-*d*<sub>6</sub>.



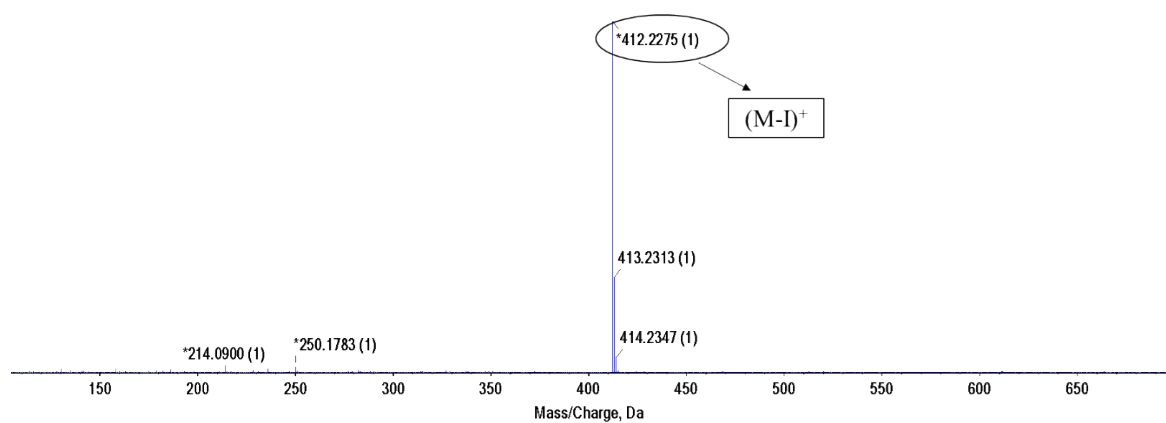

**Fig. S3** HRMS spectrum of Cy.

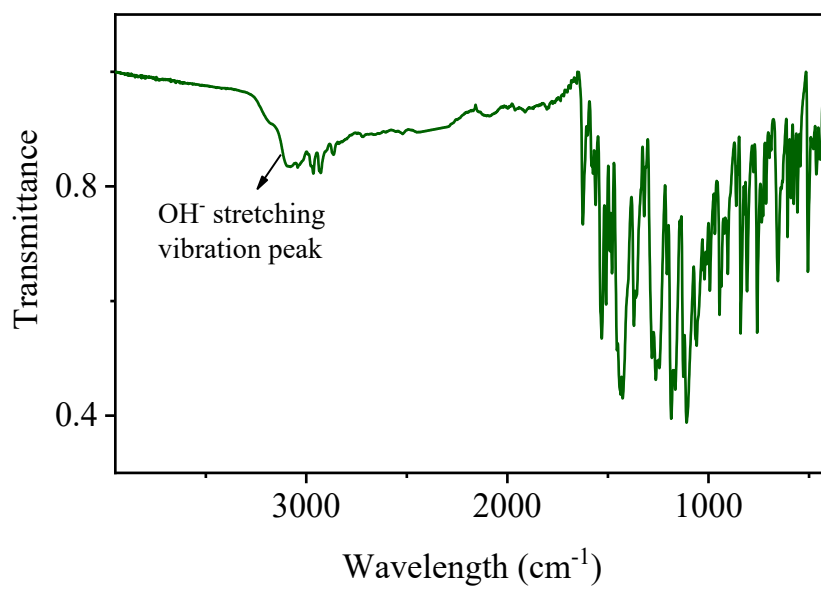

**Fig. S4** FTIR spectrum of Cy.

**Table S1** The chemical and physical properties of H<sub>2</sub>O and D<sub>2</sub>O

| Property                                       | H <sub>2</sub> O       | D <sub>2</sub> O       |
|------------------------------------------------|------------------------|------------------------|
| Melting point / °C                             | 0.00                   | 3.79                   |
| Boiling point / °C                             | 100                    | 101.4                  |
| Relative density / g·mL <sup>-1</sup> (20 °C)  | 0.997                  | 1.108                  |
| Heat of evaporation / kJ·mol <sup>-1</sup>     | 40.67                  | 41.6                   |
| Heat of fusion / kJ·mol <sup>-1</sup>          | 6.008                  | 6.276                  |
| Freezing point lowered / °C                    | 1.86                   | 2.00                   |
| Surface tension (at 25 °C, N·m <sup>-1</sup> ) | 0.07198                | 0.07187                |
| Ion product constant ( $K_w$ )                 | $1.00 \times 10^{-14}$ | $2.00 \times 10^{-15}$ |
| Refractive index (at 20 °C)                    | 1.33298                | 1.32844                |
| pH                                             | 6.4-7.0                | 7.5                    |

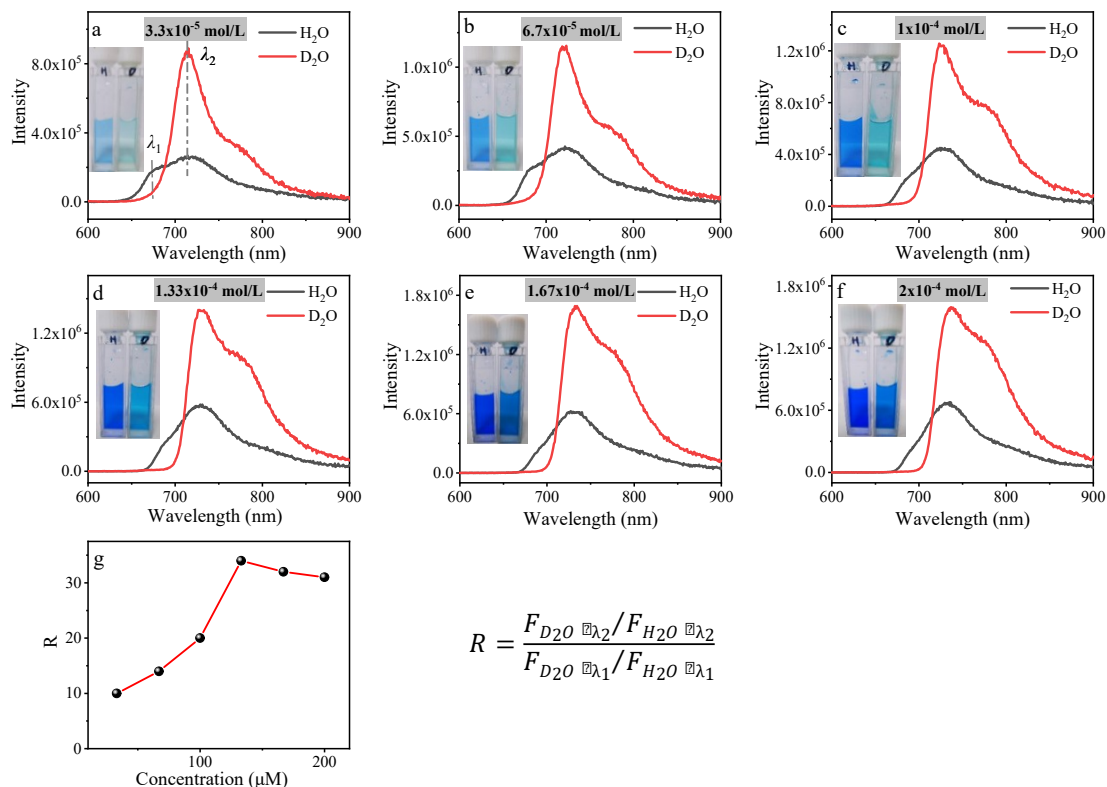

**Fig. S5** The fluorescence spectra of Cy in D<sub>2</sub>O and H<sub>2</sub>O, where the concentration of Cy is  $3.3 \times 10^{-5}$  mol/L (a),  $6.7 \times 10^{-5}$  mol/L (b),  $1.0 \times 10^{-4}$  mol/L (c),  $1.33 \times 10^{-4}$  mol/L (d),  $1.67 \times 10^{-4}$  mol/L (e) and  $2.0 \times 10^{-4}$  mol/L (f) respectively (inset: the photos of Cy in D<sub>2</sub>O and H<sub>2</sub>O, respectively). (g) Optimization diagram of the sensor concentration.

In the preliminary experiments, we found that the concentration of Cy could affect the output of the ratiometric signal, thus affecting the sensitivity of the sensor. On this basis, we optimized the concentration of Cy through comparing the difference of these ratiometric signals between D<sub>2</sub>O and H<sub>2</sub>O. As shown in **Fig. S5**, when the sensor concentration is  $1.33 \times 10^{-4}$  M, the ratio of ratiometric signal (R) reaches the maximum. Nevertheless, considering the effect of naked-eye visualization, we finally chosen the concentration of  $1 \times 10^{-4}$  M to realize the good sensitivity and distinct color difference at the same time.

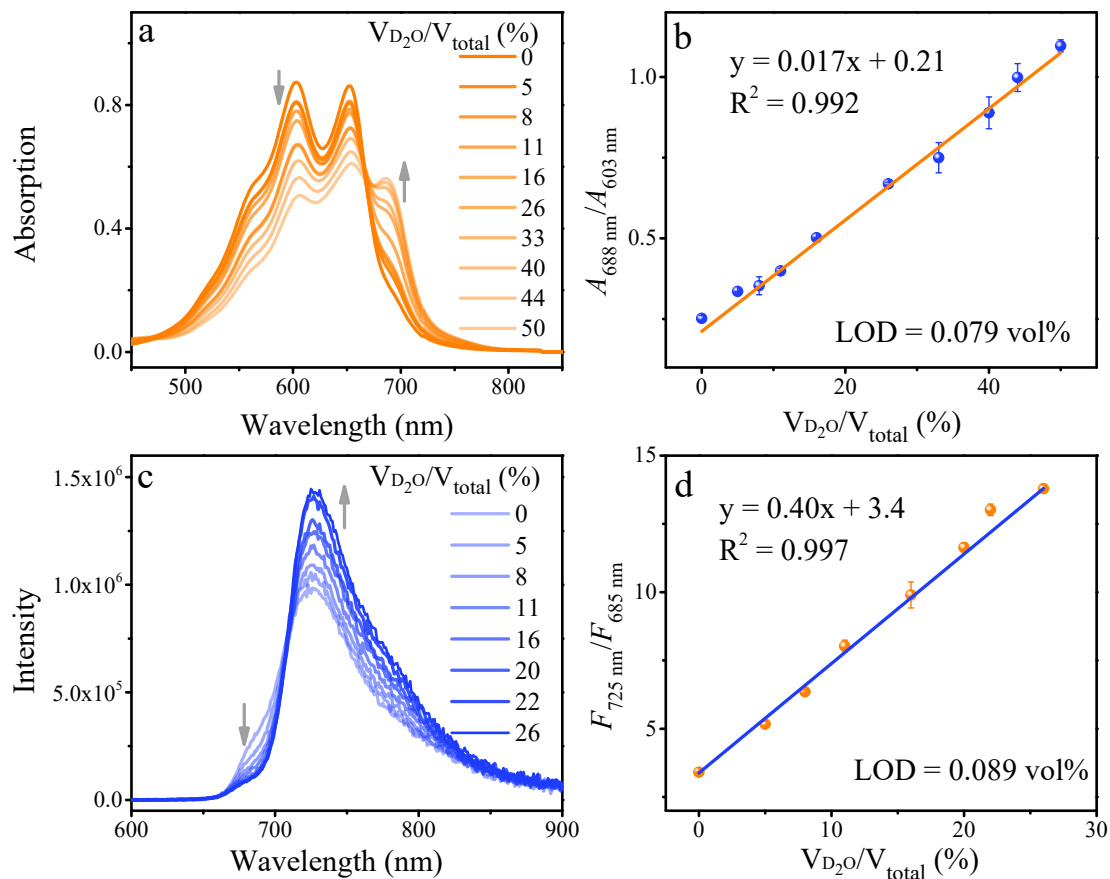

**Fig. S6** (a) UV-vis absorption spectra of Cy in H<sub>2</sub>O-D<sub>2</sub>O mixtures with different D<sub>2</sub>O fractions (0-50%, v/v). (b) Relationship between  $A_{688}/A_{603}$  of Cy with D<sub>2</sub>O content in total volume. (c) Fluorescence emission spectra of Cy in H<sub>2</sub>O-D<sub>2</sub>O mixtures with different D<sub>2</sub>O fractions (0-26%, v/v) ( $\lambda_{\text{ex}} = 580 \text{ nm}$ ). (d) Relationship between  $F_{725}/F_{685}$  values of Cy with D<sub>2</sub>O content in total volume (V<sub>total</sub> = V<sub>H<sub>2</sub>O</sub> + V<sub>D<sub>2</sub>O</sub>).

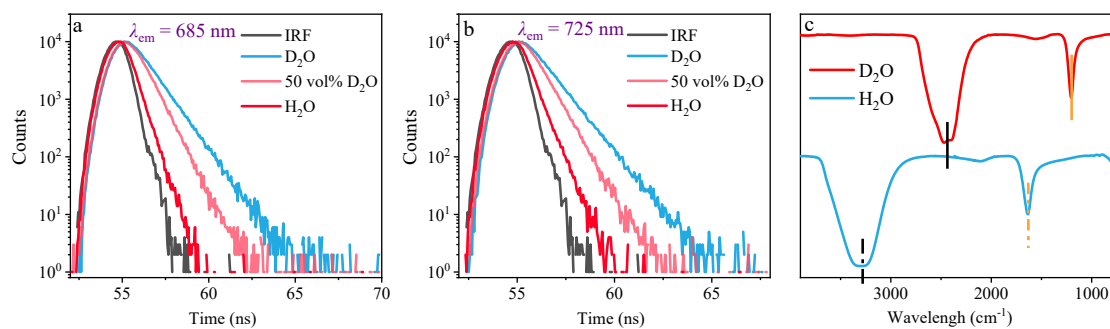

**Fig. S7** Fluorescence decay curves of **Cy** in D<sub>2</sub>O, H<sub>2</sub>O and 50 vol% of D<sub>2</sub>O monitored at (a) 685 nm and (b) 725 nm at 298K ( $\lambda_{ex} = 590$  nm, IRF: Instrument response function). (c) FTIR spectra of pure D<sub>2</sub>O and pure H<sub>2</sub>O.

**Table S2** The fitted photoluminescence lifetime data of **Cy** in D<sub>2</sub>O, H<sub>2</sub>O and 50 vol% of D<sub>2</sub>O at 298 K ( $\lambda_{ex} = 590$  nm).

|                             | $\lambda_{ex}$ (nm) | $\lambda_{em}$ (nm) | Life time<br>(ns) | content (%) | $\chi^2$ |
|-----------------------------|---------------------|---------------------|-------------------|-------------|----------|
| D <sub>2</sub> O            | 590                 | 685                 | $\tau = 1.01$     | 100         | 0.95     |
|                             |                     | 725                 | $\tau = 0.97$     | 100         | 0.91     |
| 50 vol%<br>D <sub>2</sub> O | 590                 | 685                 | $\tau = 0.73$     | 100         | 1.02     |
|                             |                     | 725                 | $\tau = 0.70$     | 100         | 0.82     |
| H <sub>2</sub> O            | 590                 | 685                 | $\tau = 0.32$     | 100         | 1.10     |
|                             |                     | 725                 | $\tau = 0.35$     | 100         | 1.20     |

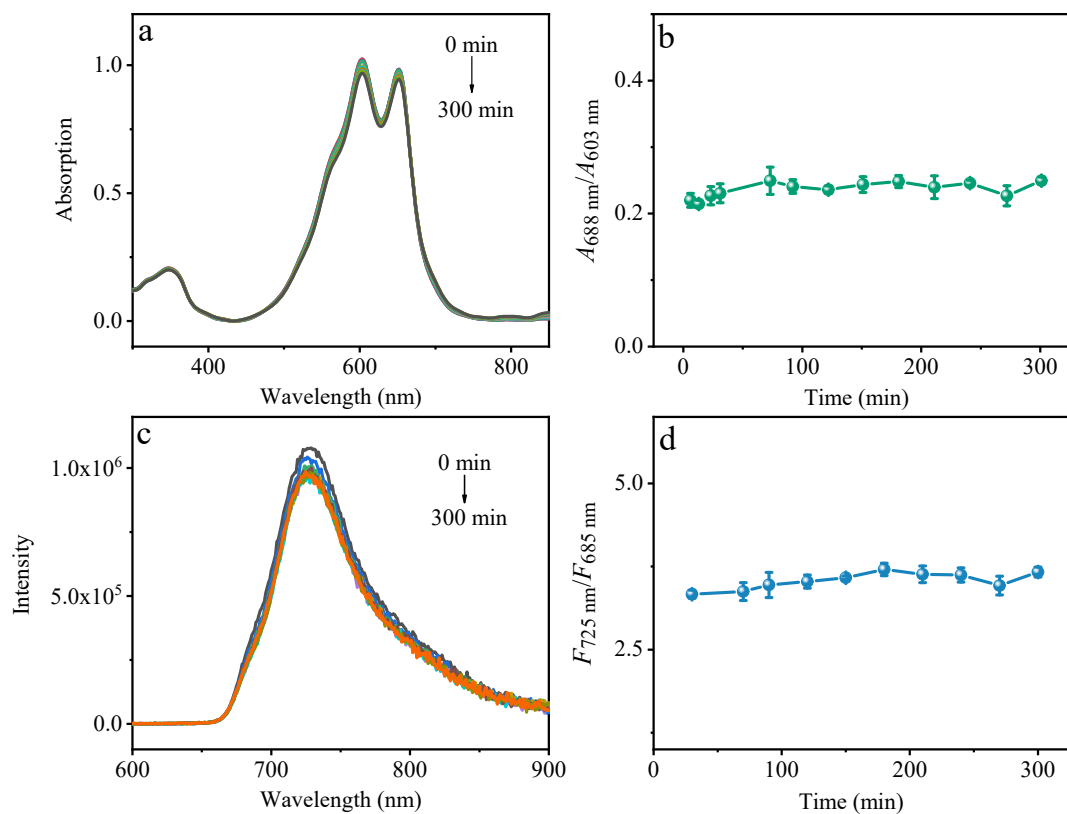

**Fig. S8** Time-dependent UV-vis absorption spectra (a) and relationship between  $A_{688}/A_{603}$  with time (b) of the sensor Cy in H<sub>2</sub>O. Time-dependent fluorescence emission spectra (c) and relationship between  $F_{725}/F_{685}$  with time (d) of the sensor Cy in H<sub>2</sub>O ( $\lambda_{\text{ex}} = 580 \text{ nm}$ ).

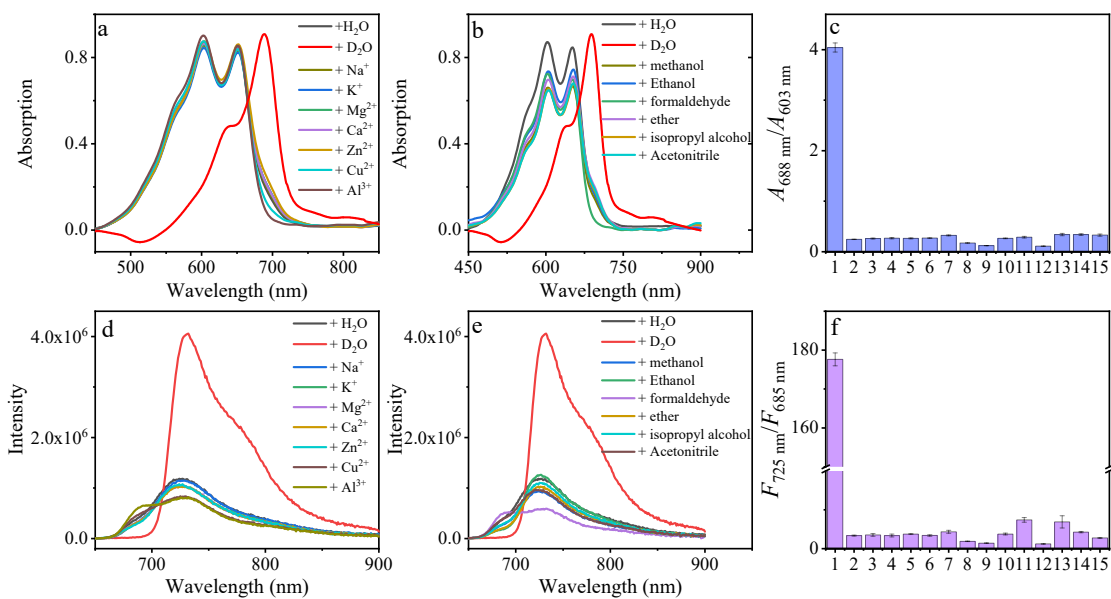

**Fig. S9** UV-vis absorption spectra (a) and fluorescence emission spectra (d) of Cy in the D<sub>2</sub>O, H<sub>2</sub>O and H<sub>2</sub>O containing various metal ions (concentration: 1 mM; counter ion: Cl<sup>-</sup>). UV-vis absorption spectra (b) and fluorescence emission spectra (e) of Cy in the D<sub>2</sub>O, H<sub>2</sub>O and H<sub>2</sub>O containing 11 vol% different organic pollutant species. Absorption (c) and fluorescence (f) response of Cy in the presence of the other common species. 1, D<sub>2</sub>O; 2, H<sub>2</sub>O; 3, Na<sup>+</sup>; 4, K<sup>+</sup>; 5, Mg<sup>2+</sup>; 6, Ca<sup>2+</sup>; 7, Zn<sup>2+</sup>; 8, Cu<sup>2+</sup>; 9, Al<sup>3+</sup>; 10, methanol; 11, ethanol; 12, formaldehyde; 13, ether; 14, isopropyl alcohol; and 15, acetonitrile ( $\lambda_{\text{ex}} = 580 \text{ nm}$ ).

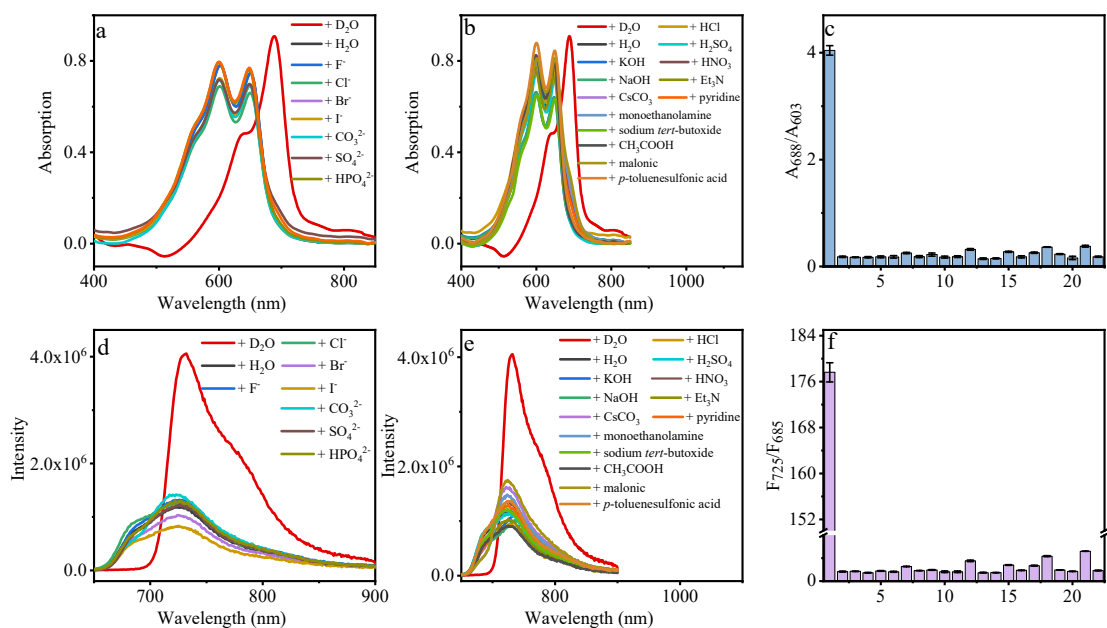

**Fig. S10** UV-vis absorption spectra (a) and fluorescence emission spectra (d) of Cy in the D<sub>2</sub>O, H<sub>2</sub>O and H<sub>2</sub>O containing various anions (concentration: 10 μM). UV-vis absorption spectra (b) and fluorescence emission spectra (e) of Cy in the D<sub>2</sub>O, H<sub>2</sub>O and H<sub>2</sub>O containing different acid and base species (concentration: 10 μM). Absorption (c) and fluorescence (f) response of Cy in the presence of the other common species. 1, D<sub>2</sub>O; 2, H<sub>2</sub>O; 3, F<sup>-</sup>; 4, Cl<sup>-</sup>; 5, Br<sup>-</sup>; 6, I<sup>-</sup>; 7, CO<sub>3</sub><sup>2-</sup>; 8, SO<sub>4</sub><sup>2-</sup>; 9, HPO<sub>4</sub><sup>2-</sup>; 10, KOH; 11, NaOH; 12, CsCO<sub>3</sub>; 13, HCl; 14, H<sub>2</sub>SO<sub>4</sub>; 15, HNO<sub>3</sub>; 16, Et<sub>3</sub>N; 17, pyridine; 18, monoethanolamine; 19, sodium *tert*-butoxide; 20, CH<sub>3</sub>COOH; 21, malonic; and 22, *p*-toluenesulfonic acid ( $\lambda_{\text{ex}} = 580$  nm).

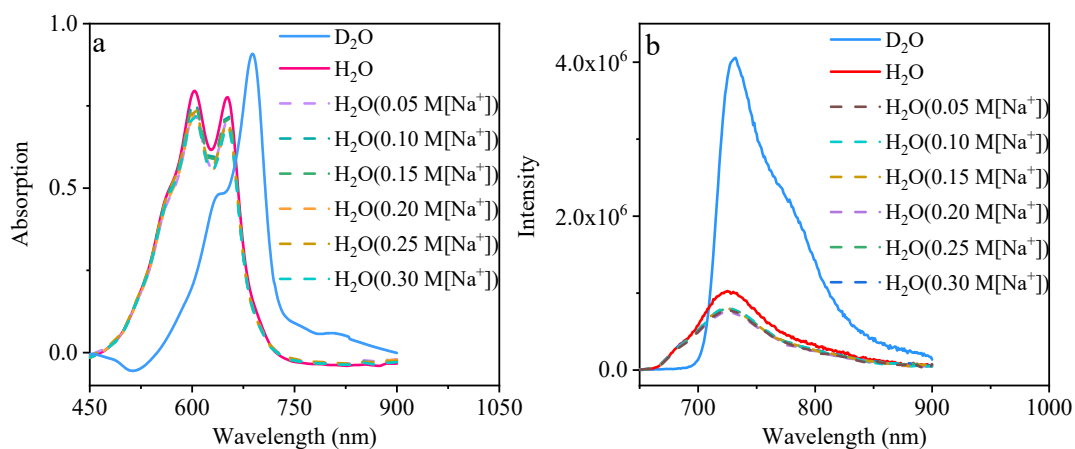

**Fig. S11** UV-vis absorption spectra (a) and fluorescence emission spectra (b) of Cy in the D<sub>2</sub>O, H<sub>2</sub>O and H<sub>2</sub>O with different concentration of Na<sup>+</sup> ion ( $\lambda_{\text{ex}} = 580$  nm).



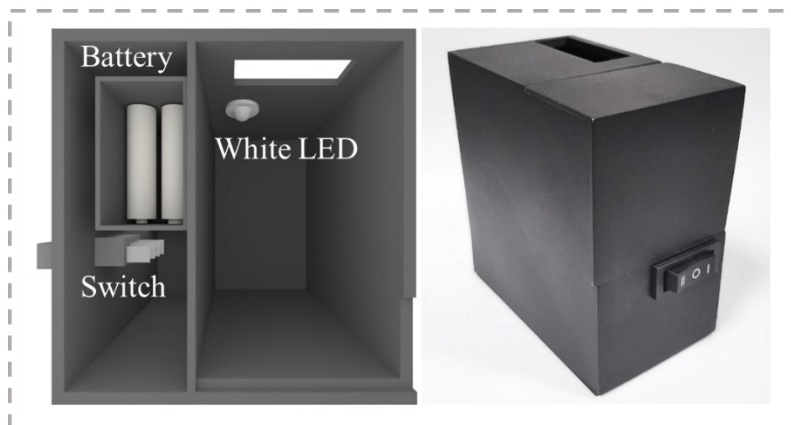

**Scheme. S3** Schematic illustration of the basic construction of 3D-printed setup.

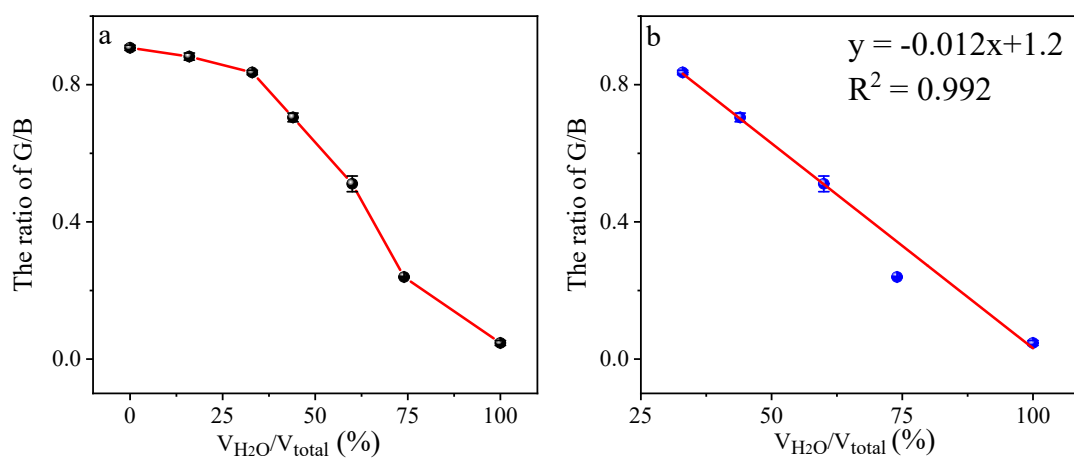

**Fig. S12** (a) Calibration curve of the G/B ratio of corresponding solutions analyzed with a smartphone versus H<sub>2</sub>O contents in H<sub>2</sub>O-D<sub>2</sub>O mixtures; and (b) linear relationship between the G/B ratio and the H<sub>2</sub>O contents in H<sub>2</sub>O-D<sub>2</sub>O mixtures ranging from 33% to 100%.

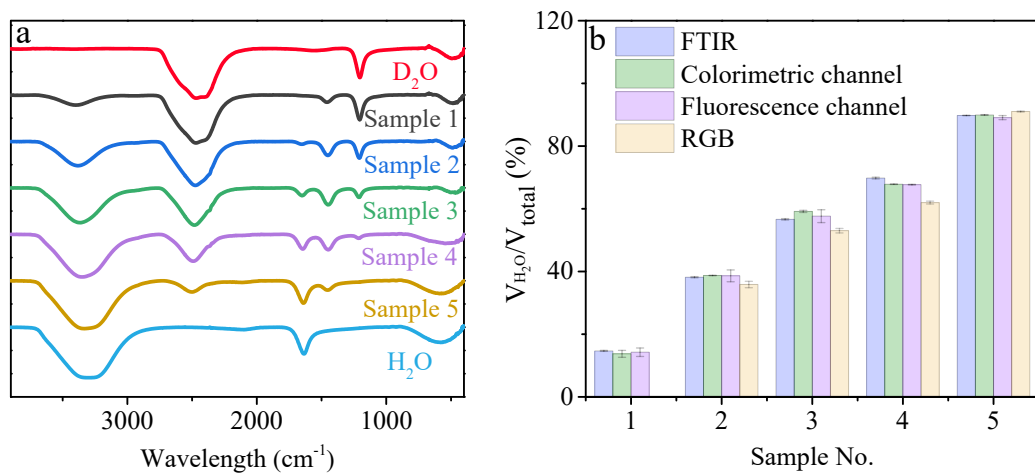

**Fig. S13** (a) FTIR spectra of pure D<sub>2</sub>O, pure H<sub>2</sub>O and five samples prepared by random addition of H<sub>2</sub>O into D<sub>2</sub>O. (b) Determination of the H<sub>2</sub>O content in H<sub>2</sub>O-D<sub>2</sub>O mixtures by the FTIR reference method and our proposed methods.

**Table S3** Analytical results for the determination of H<sub>2</sub>O content in total volume (%)

| Sample no. | FTIR       | Colorimetric channel | Fluorescence channel | RGB               |
|------------|------------|----------------------|----------------------|-------------------|
| 1          | 14.7 ± 0.1 | 13.7 ± 1.1           | 14.3 ± 1.3           | -- <sup>[a]</sup> |
| 2          | 38.2 ± 0.2 | 38.7 ± 0.1           | 38.6 ± 1.9           | 35.9 ± 1.0        |
| 3          | 56.7 ± 0.2 | 59.2 ± 0.3           | 57.7 ± 2.0           | 53.0 ± 0.7        |
| 4          | 69.8 ± 0.3 | 67.8 ± 0.1           | 67.7 ± 0.1           | 62.0 ± 0.4        |
| 5          | 89.8 ± 0.1 | 89.8 ± 0.1           | 89.1 ± 0.6           | 91.0 ± 0.1        |

<sup>[a]</sup> The ratio of G/B obtained by taking picture of this sample was not within the linear range, so the H<sub>2</sub>O content calculation was not done.

**Table S4.** Comparison of currently reported organic small-molecule optical sensors based on the acid-base response mechanism for distinguishing between H<sub>2</sub>O and D<sub>2</sub>O.

| Sensor <sup>[a]</sup>                                                                                    | Response                                              | Solvent                   | LOD                                                                                                        | Application | Ref |
|----------------------------------------------------------------------------------------------------------|-------------------------------------------------------|---------------------------|------------------------------------------------------------------------------------------------------------|-------------|-----|
| 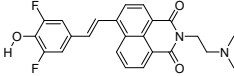<br>NIM-2F              | Colorimetric Ratiometric                              | DMSO                      | 0.24 vol%                                                                                                  | --          | 2   |
| <br>AF                  | Absorption and Fluorescence<br>Dual Ratiometric       | DMSO                      | 0.08 vol%                                                                                                  | --          | 2   |
| <br>CF-D <sub>2</sub> O | Fluorescence Turn-off                                 | DMSO<br>(10 μM 0.33 vol%) | 0.165 vol%                                                                                                 | --          | 3   |
| <br>ES                  | Colorimetric Ratiometric and<br>Fluorescence Turn-off | DMSO                      | --                                                                                                         | --          | 4   |
| <br>TPA-DP-COOH       | Fluorescence Turn-off                                 | H <sub>2</sub> O          | 49.08 ppm<br>0.23 ppm                                                                                      | --          | 5   |
| <br>HTI               | Absorption and Fluorescence<br>Dual Ratiometric       | DMSO<br>(20 μM 0.2 vol%)  | 0.19 vol%<br>(H <sub>2</sub> O in D <sub>2</sub> O)<br>0.59 vol%<br>(D <sub>2</sub> O in H <sub>2</sub> O) | --          | 6   |

|                                                                                                                         |                                                                                     |                                                                           |                                                                                                                                            |                                                        |                                                  |
|-------------------------------------------------------------------------------------------------------------------------|-------------------------------------------------------------------------------------|---------------------------------------------------------------------------|--------------------------------------------------------------------------------------------------------------------------------------------|--------------------------------------------------------|--------------------------------------------------|
| 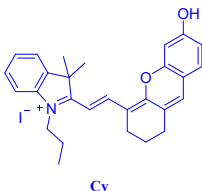 <p style="text-align: center;">Cy</p> | <p style="text-align: center;">Absorption and Fluorescence<br/>Dual Ratiometric</p> | <p style="text-align: center;">DMF<br/>(100 <math>\mu</math>M 5 vol%)</p> | <p style="text-align: center;">0.061 vol%<br/>(H<sub>2</sub>O in D<sub>2</sub>O)<br/>0.079 vol%<br/>(D<sub>2</sub>O in H<sub>2</sub>O)</p> | <p style="text-align: center;">RGB<br/>colorimetry</p> | <p style="text-align: center;">This<br/>work</p> |
|-------------------------------------------------------------------------------------------------------------------------|-------------------------------------------------------------------------------------|---------------------------------------------------------------------------|--------------------------------------------------------------------------------------------------------------------------------------------|--------------------------------------------------------|--------------------------------------------------|

[a] The full names of these sensors:

**NIM-2F:** (*E*)-6-(3,5-difluoro-4-hydroxystyryl)-2-(2-(dimethylamino)ethyl)-1H-benzo[de]isoquinoline-1,3(2H)-dione

**AF:** 5-amino-3',6'-dihydroxy-3H-spiro[isobenzofuran-1,9'-xanthen]-3-one

**CF-D<sub>2</sub>O:** 3'-hydroxy-6'-(4-(7-hydroxy-2-oxo-2H-chromene-3-carbonyl)piperazin-1-yl)-3H-spiro[isobenzofuran-1,9'-xanthen]-3-one

**ES:** 6,7-dihydroxy-2H-chromen-2-one

**TPA-DP-COOH:** 4-(4-(diphenylamino)phenyl)-2,6-dimethylpyridine-3,5-dicarboxylic acid

**HIT:** (*E*)-2-(4-hydroxystyryl)-3,3-dimethyl-1-propyl-3H-indol-1-ium iodide

**Table S5** Comparison of currently reported optical sensors based on other response mechanism for distinguishing between H<sub>2</sub>O and D<sub>2</sub>O.

| Sensor Name                                                                     | Type of system                 | Mechanism                | Response                                                               | LOD                                                                                                    | Ref       |
|---------------------------------------------------------------------------------|--------------------------------|--------------------------|------------------------------------------------------------------------|--------------------------------------------------------------------------------------------------------|-----------|
| <i>p</i> -CPDs                                                                  | Carbon polymer dots            | O-H oscillator quenching | Fluorescence Turn-off                                                  | 0.10 vol %                                                                                             | 7         |
| Eu <sub>1</sub> :Tb <sub>5</sub> -PCM-22                                        | MOF                            | O-H oscillator quenching | Ratiometric Fluorescence                                               | --                                                                                                     | 8         |
| SCU-UEu-1                                                                       | MOF                            | O-H oscillator quenching | Ratiometric Fluorescence                                               | 1 vol%                                                                                                 | 9         |
| Poly-Eu-2                                                                       | MOF                            | O-H oscillator quenching | Fluorescence Turn-off                                                  | 18.3 ppm                                                                                               | 10        |
| {[Tb(HL)(H <sub>2</sub> O) <sub>2</sub> ]<br>x(sol <sub>v</sub> )} <sub>n</sub> | MOF                            | O-H oscillator quenching | Ratiometric Fluorescence                                               | 0.48 vol %                                                                                             | 11        |
| PT10                                                                            | Organic polymers               | O-H oscillator quenching | Phosphorescence Turn-off                                               | 0.1 vol%                                                                                               | 12        |
| TCPP                                                                            | Purely organic small molecules | O-H oscillator quenching | ultraviolet-visible, Fluorescence and electrochemiluminescence Turn-on | 0.29 nM                                                                                                | 13        |
| Cy                                                                              | Purely organic small molecules | Acid-base response       | Absorption and Fluorescence Dual Ratiometric                           | 0.061 vol% (H <sub>2</sub> O in D <sub>2</sub> O)<br>0.079 vol% (D <sub>2</sub> O in H <sub>2</sub> O) | This work |

**Table S6.** The advantages and disadvantages of representative D<sub>2</sub>O optical sensors.

| Sensor                   | Advantages                                                                                           | Disadvantages                                                                             |
|--------------------------|------------------------------------------------------------------------------------------------------|-------------------------------------------------------------------------------------------|
| <b>NIM-2F</b>            | naked-eye visualization, absorption ratiometric response                                             | poor water-solubility, single channel response, insufficient detection sensitivity        |
| <b>AF</b>                | absorption/fluorescence dual-channel ratiometric response                                            | poor water-solubility and naked-eye visualization, insufficient detection sensitivity     |
| <b>CF-D<sub>2</sub>O</b> | water-solubility, two turn-on fluorescence signals response                                          | single channel response, poor naked-eye visualization, insufficient detection sensitivity |
| <b>ES</b>                | readily available sensor, absorption/fluorescence dual-channel response,                             | poor water-solubility and naked-eye visualization                                         |
| <b>TPA-DP-COOH</b>       | brilliant water-solubility and sensitivity of detection                                              | single channel response, poor naked-eye visualization                                     |
| <b>HIT</b>               | water-solubility, absorption/fluorescence dual-channel ratiometric response                          | insufficient naked-eye visualization and detection sensitivity                            |
| <b>Cy</b>                | water-solubility, absorption/fluorescence dual-channel ratiometric response, naked-eye visualization | insufficient detection sensitivity                                                        |

### 3. References:

1. L. Yuan, W. Lin, S. Zhao, W. Gao, B. Chen, L. He and S. Zhu, *J. Am. Chem. Soc.*, 2012, **134**, 13510-13523.
2. Y. Luo, C. Li, W. Zhu, X. Zheng, Y. Huang and Z. Lu, *Angew. Chem. Int. Ed.*, 2019, **58**, 6280-6284.
3. B. Dong, Y. Lu, W. Song, X. Kong, Y. Sun and W. Lin, *Chem. Commun.*, 2020, **56**, 1191-1194.
4. S. Gadiyaram, P. Kumar, A. Singh and D. Amilan Jose, *Microchem. J.*, 2022, **176**, 107244.
5. S. Zhang, Z. Li, B. Zhang, F. Dong, B. Han, J. Lv, Y. Sun, H. Lu, Y. Yang and H. Ma, *New J. Chem.*, 2021, **45**, 20441-20446.
6. J. Liu, X. Ma, Q. Song, J. Zang, J. Hao, W. Liu and J. Jiang, *Chem. Commun.*, 2022, **58**, 9262-9265.
7. J. Xia, Y. L. Yu and J. H. Wang, *Chem. Commun.*, 2019, **55**, 12467-12470.
8. S. G. Dunning, A. J. Nuñez, M. D. Moore, A. Steiner, V. M. Lynch, J. L. Sessler, B. J. Holliday and S. M. Humphrey, *Chem*, 2017, **2**, 579-589.
9. Y. Zhang, L. Chen, Z. Liu, W. Liu, M. Yuan, J. Shu, N. Wang, L. He, J. Zhang, J. Xie, X. Chen and J. Diwu, *ACS Appl. Mater. Interfaces.*, 2020, **12**, 16648-16654.
10. S. Zhang, W. Yin, Z. Yang, I. Shah, Y. Yang, Z. Li, S. Zhang, B. Zhang, Z. Lei and H. Ma, *Anal. Chem.*, 2020, **92**, 7808-7815.
11. M. Lei, F. Ge, X. Gao, Z. Shi and H. Zheng, *Inorg. Chem.*, 2021, **60**, 10513-10521.
12. Y. Lang, S. Wu, Q. Yang, Y. Luo, X. Jiang and P. Wu, *Anal. Chem.*, 2021, **93**, 9737-9743.
13. Z. Han, J. Wang, P. Du, J. Chen, S. Huo, H. Guo and X. Lu, *Anal. Chem.*, 2022, **94**, 8426-8432.
